# Supplementary material for: FaMYB5 Interacts with FaBBX24 to Regulate Anthocyanin and Proanthocyanidin Biosynthesis in Strawberry (Fragaria × ananassa)
Source: MDPI journal article supplement (doi:10.3390/ijms241512185), 2023-07-29
Supplement: s1 [file s1]

# The coding sequences of FaBBX24

>FaBBX24

ATGAAAATTCAGTGCATGTGTGTGAGAAAGCTCCGGCGACGGTGATCTGTTGCGCTG  
ACGAGGCGGCCCTCTGTGCCAAATGCGATGTGGAAGTGCACGCAGCAAACAACTCG  
CCAGCAAGCATCAGAGGCTTGTTCTTGAATCTCTCTCCAACAAGCTCCCTAGATGTGAT  
ATATGCCAAGATAAGGCTGCTTTTATCTTCTGCGTTGAAGACAGAGCCCTGTTTTGTCA  
GGACTGTGATGAATCAATTCATTCAGGAAATACCCTCTCTGCCAACCACCAGAGGTTCC  
TCGCCACCGGAATCCGCGTTGCTTTGAGCTCCGCCTGTAATAACAAGGACGCTCAAAC  
AAGTAGCTTAGACCCACCCAATCAAATACTTACACCTAGTTTCAACCAAACCTGCCTA  
ATTCTCTATTCTCGCCTCCTTGGGCGGTTGATGACTTGCTCCAGTTATCAGATTTTGAAT  
CTTCTGACAAGAAAGAGTCGCTTGAGTTTGGAGAGCTTGAATGGATGGCAGATATGGG  
TCTTTTGGTGAGCATTTTCCTCAGGATGCTTTGGCAGCAGCTGAAGTACCTCAGCTTC  
CAGTATCACAATCTAGCAACTATACATCATACAGACCCCGAAATCAAACAGTCCCTAC  
AAGAAGCCTAGGATTGAAATCCCGGATGATGATGATGAGCATTTCACTGTTTCTGATCT  
TGGCATATTTTAG
